# Supplementary material
Source: MDPI journal article supplement (https://www.mdpi.com/2304-6732/10/9/1062)
Supplement: s1 [file s1]

# Millisecond-Response Nematic Liquid Crystal for Augmented Reality Displays

Jiaxing Tang, Ran Chen \*, Zhongwei An \*, Xinbing Chen and Pei Chen

Key Laboratory of Applied Surface and Colloid Chemistry (MOE), International Joint Research Center of Shaanxi Province for Photoelectric Materials Science, Shaanxi Key Laboratory for Advanced Energy Devices, Shaanxi Engineering Laboratory for Advanced Energy Technology, School of Materials Science and Engineering, Shaanxi Normal University, Xi'an 710119, China; tangjiaxing@snnu.edu.cn (J.T.); chenxinbing@snnu.edu.cn (X.C.); chenpei@snnu.edu.cn (P.C.)

\* Correspondence: tradchenr@snnu.edu.cn (R.C.); gmeazw@163.com (Z.A.)

## Supporting Information

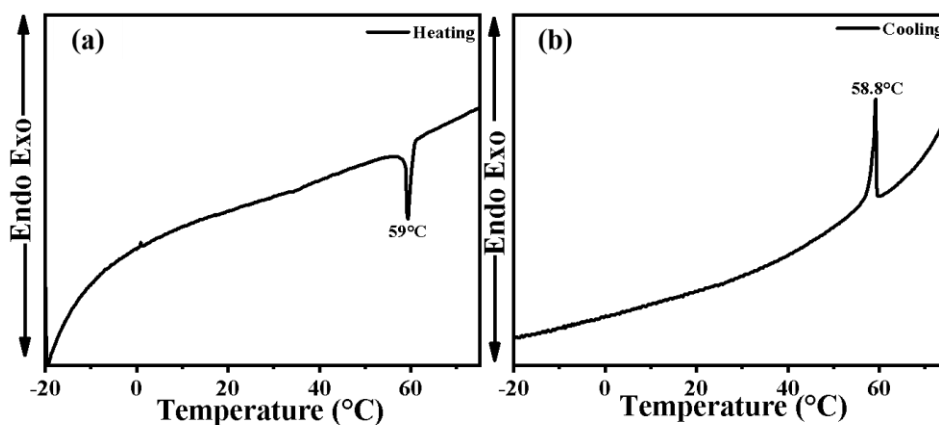

Figure S1. DSC traces of SNUP01: (a) heating; (b) cooling.
